# Supplementary material for: Comparison of Transvalvular Aortic Mean Gradients Obtained by Intraprocedural Echocardiography and Invasive Measurement in Balloon and Self‐Expanding Transcatheter Valves
Source: PubMed Central journal article supplement — J Am Heart Assoc. 2021 Sep 29;10(19):e021014. doi: 10.1161/JAHA.120.021014 (PMC8649128; doi:10.1161/jaha.120.021014), 2021-09-29
Supplement: JAH3-10-e021014-s001.pdf [file JAH3-10-e021014-s001.pdf]

# **SUPPLEMENTAL MATERIAL**

**Figure S1. Post transcatheter aortic valve replacement (TAVR) invasive versus echocardiographic mean-gradients in 20 and 23 mm balloon expandable valves (BEV).**

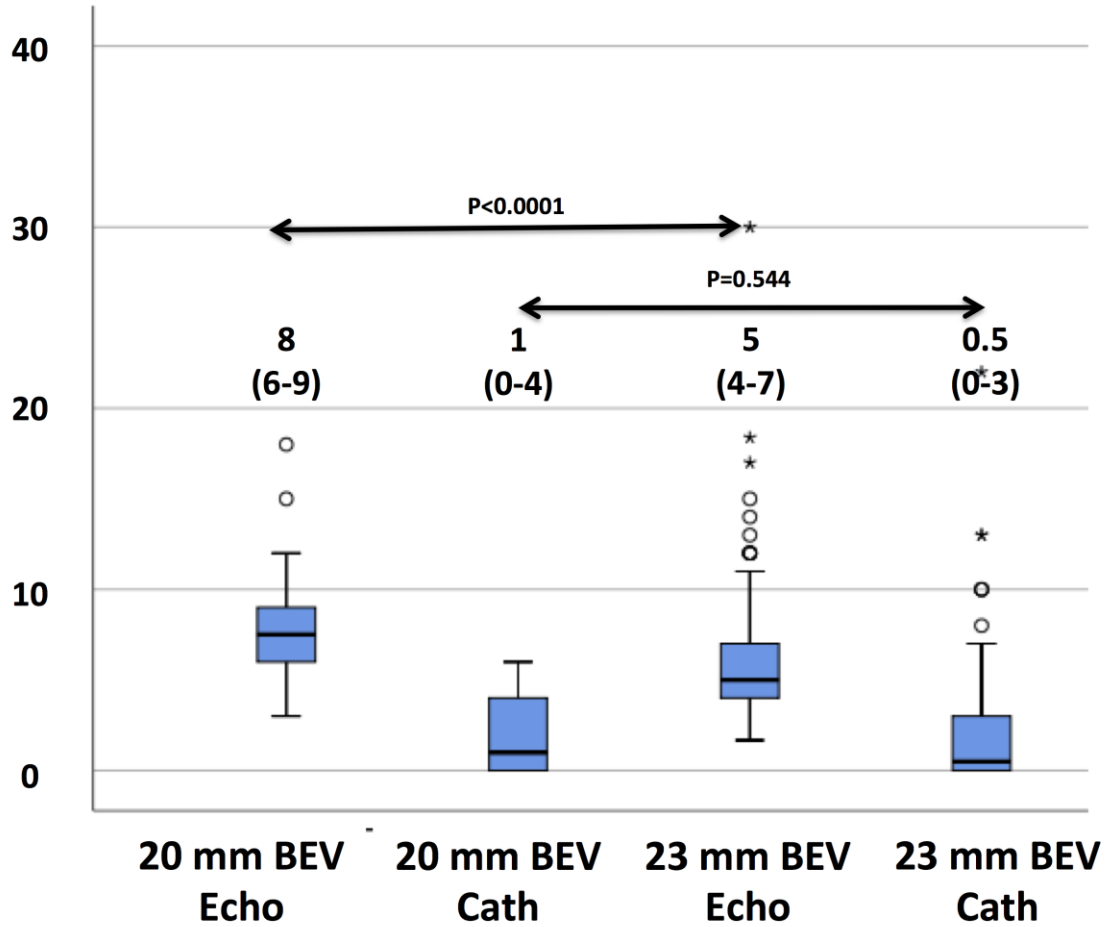

There was no difference in invasive mean-gradients between both valves and discordance between echocardiographic and invasive mean-gradients was noted in both. However, 20 mm BEV valves demonstrated a higher echocardiographic mean gradient compared to the 23 mm BEV. Data is presented as median, IQR.

**Figure S2. Post versus discharge (D/C) echocardiographic mean gradients (A), absolute (C), and percent (D) difference between post and D/C mean-gradients in small and large balloon expandable (BEV) and self-expanding (SEV) valves. A sub study of 20 mm BEV versus 23 mm BEV is demonstrated in (B).**

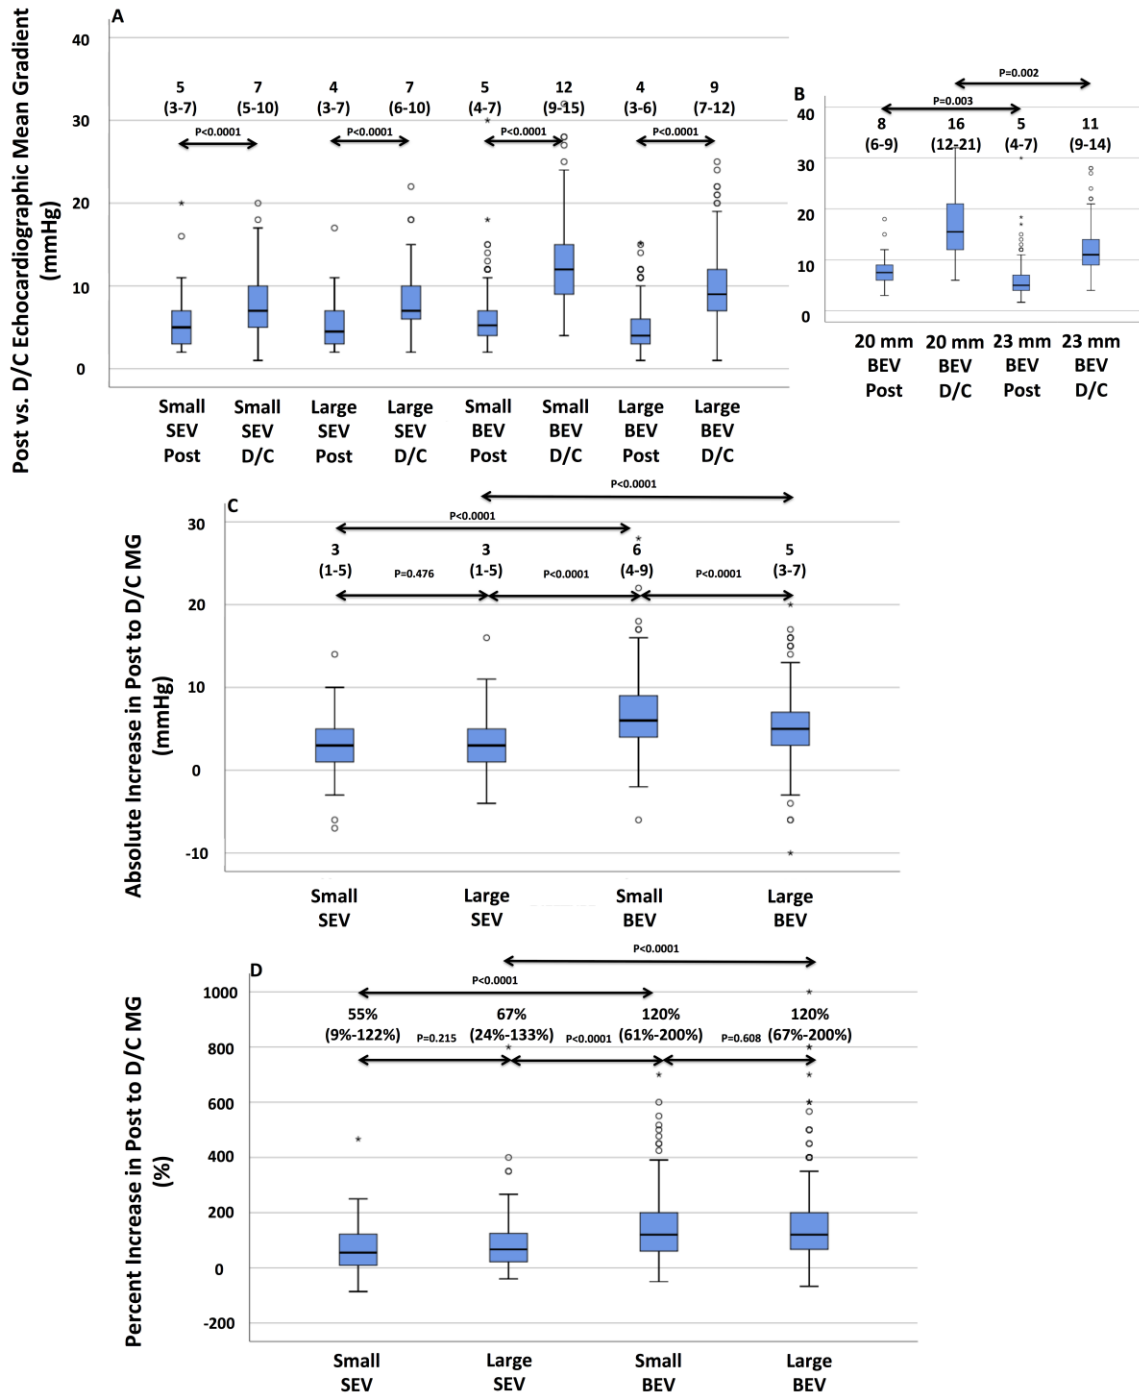

Small BEV exhibited higher discharge echocardiographic mean-gradients than any other valve type or size. In fact, 20 mm BEV exhibited even a higher discharge echocardiographic mean-gradient compared to 23 mm BEV. While small BEV exhibited higher discharge echocardiographic mean-gradients, higher absolute difference, and similar percent difference in discharge versus post TAVR mean-gradients compared to large BEV, small SEV exhibited similar discharge echocardiographic mean-gradients and absolute and percent differences compared to large SEV (As also noted in FIGURE 4).
